# Supplementary material for: Homogeneously and gradually anchored self-assembled monolayer by tunable vapor phase-assisted silanization
Source: Royal Society of Chemistry journal article supplement (doi:10.1039/c3ra41471j), 2013-01-01
Supplement: c3ra41471j.pdf [file c3ra41471j.pdf]

## Homogeneously and gradually anchored self-assembled monolayer by tunable vapor phase-assisted silanization

Grégoire Souharce, Jannick Duchet-Rumeau, Daniel Portinha,\* and Aurélia Charlot\*

*Université de Lyon, F-69631, Lyon; INSA Lyon, F-69621, UMR CNRS 5223, Ingénierie des Matériaux Polymères F-69621, Villeurbanne, France. Fax: +33 (0)4 72 43 85 27; Tel: +33 (0)4 72 43 63 38; E-mail: [daniel.portinha@insa-lyon.fr](mailto:daniel.portinha@insa-lyon.fr), [aurelia.charlot@insa-lyon.fr](mailto:aurelia.charlot@insa-lyon.fr)*

### Electronic Supporting Information

#### Determination of the Surface Energies

The surface energies of ODMS monolayers were estimated as a function of exposure time. We used the Fowkes-van Oss-Chaudhury-Good model.<sup>1</sup> It describes the total surface energy as a combination of dispersive interactions (Lifshitz-van der Waals) and polar interactions (Lewis acid-base).

$$\gamma^{total} = \gamma^{LW} + \gamma^{AB}$$

where  $\gamma^{LW}$  is the dispersive (or Lifshitz - van der Waals) component. Chaudhury demonstrated that the dispersion (London), induction (Debye) and dipole (Keesom)

contributions to the apolar component are additive.  $\gamma^{AB}$  refer to the polar (or Lewis acid-base) components and is given by

$$\gamma^{AB} = 2\sqrt{\gamma^+ \gamma^-}$$

where the electron donor parameter is designated as  $\gamma^-$  (basic component) and the electron acceptor one is designated as  $\gamma^+$  (acidic component). Then, using the Dupré equation gives

$$\gamma_L (1 + \cos \theta) = 2(\sqrt{\gamma_S^{LW} \gamma_L^{LW}} + \sqrt{\gamma_S^+ \gamma_L^-} + \sqrt{\gamma_S^- \gamma_L^+})$$

Three independent equations are obtained by measuring the contact angle of three liquids (2 polar and 1 dispersive) for which the parameters  $\gamma_L^+$ ,  $\gamma_L^-$  and  $\gamma_L^{LW}$  are known.

| Liquids                   | $\gamma_L^{total} (mJ / m^2)$ | $\gamma_L^{LW} (mJ / m^2)$ | $\gamma_L^{AB} (mJ / m^2)$ | $\gamma_L^+ (mJ / m^2)$ | $\gamma_L^- (mJ / m^2)$ |
|---------------------------|-------------------------------|----------------------------|----------------------------|-------------------------|-------------------------|
| Water                     | 72.8                          | 21.8                       | 51.0                       | 25.5                    | 25.5                    |
| Glycerol                  | 64.0                          | 34.0                       | 30.0                       | 3.92                    | 57.4                    |
| $\alpha$ -bromonaphtalene | 44.4                          | 44.4                       | $\approx 0$                | 0                       | 0                       |

1. C.J. Van Oss, R.J. Good and M.K. Chaudhury, *Langmuir*, 1988, **4**, 884.

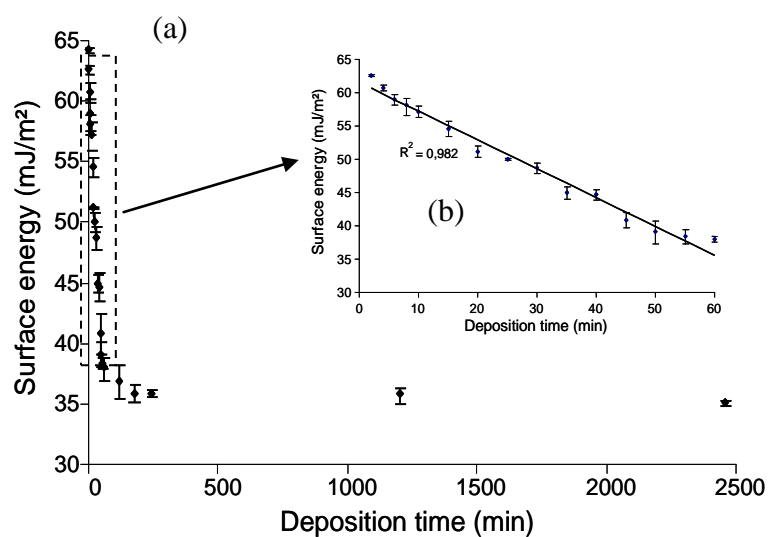

Figure 1. (a) Total surface energy as a function of the exposure time (grafting of ODMS at 60 °C) and (b) magnification for time comprised between 2 and 60 min. The reported errors refer to the standard deviation for each independent experiment.

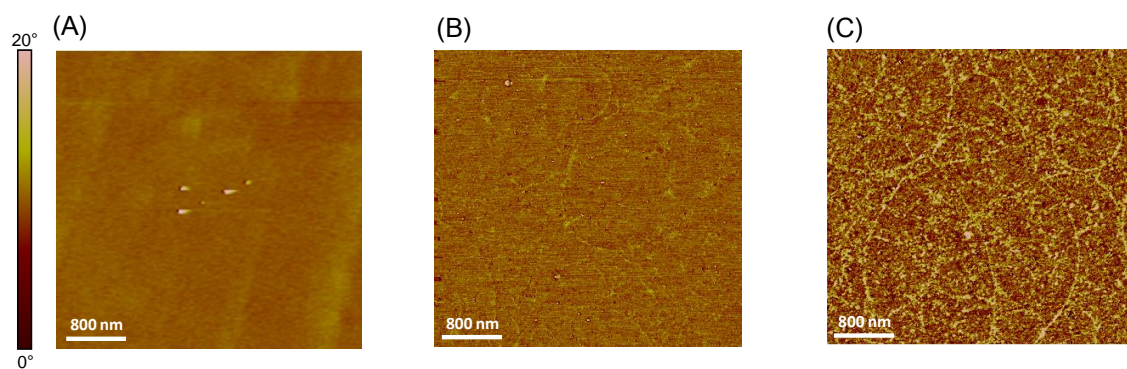

Figure 2. AFM phase images of ODMS-grafted silicon obtained after grafting time of 4 min, 40 min and 60 min (pictures (A), (B) and (C) respectively).

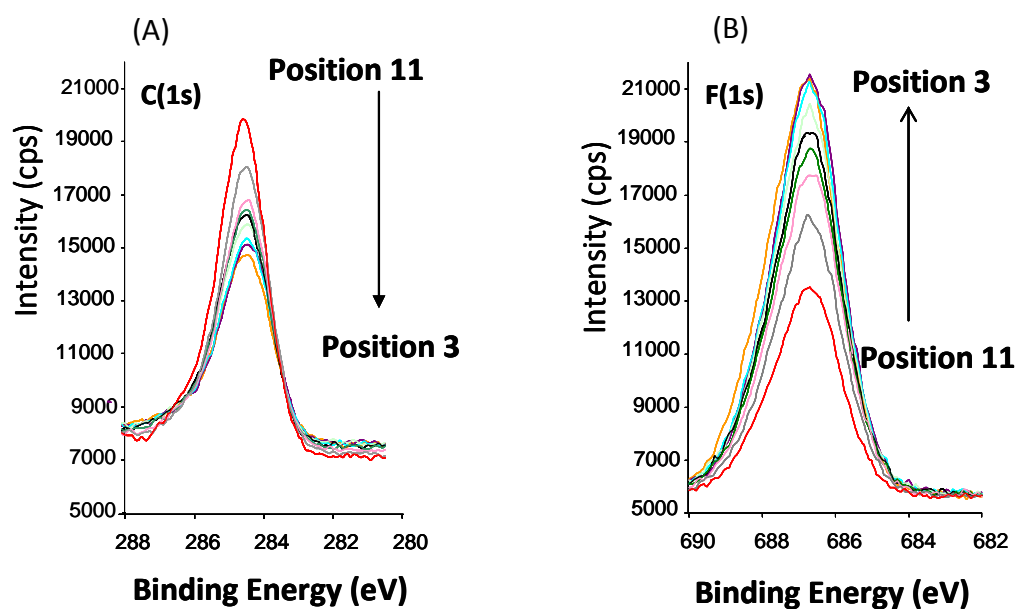

Figure 3. Intensity of C1s (A) and F1s (B) atomic concentration collected on 11 different locations of a silicon wafer firstly exposed to ODMS vapour for 10 min at 110 °C and then exposed to HFDMC vapor for 30 min at 25 °C.

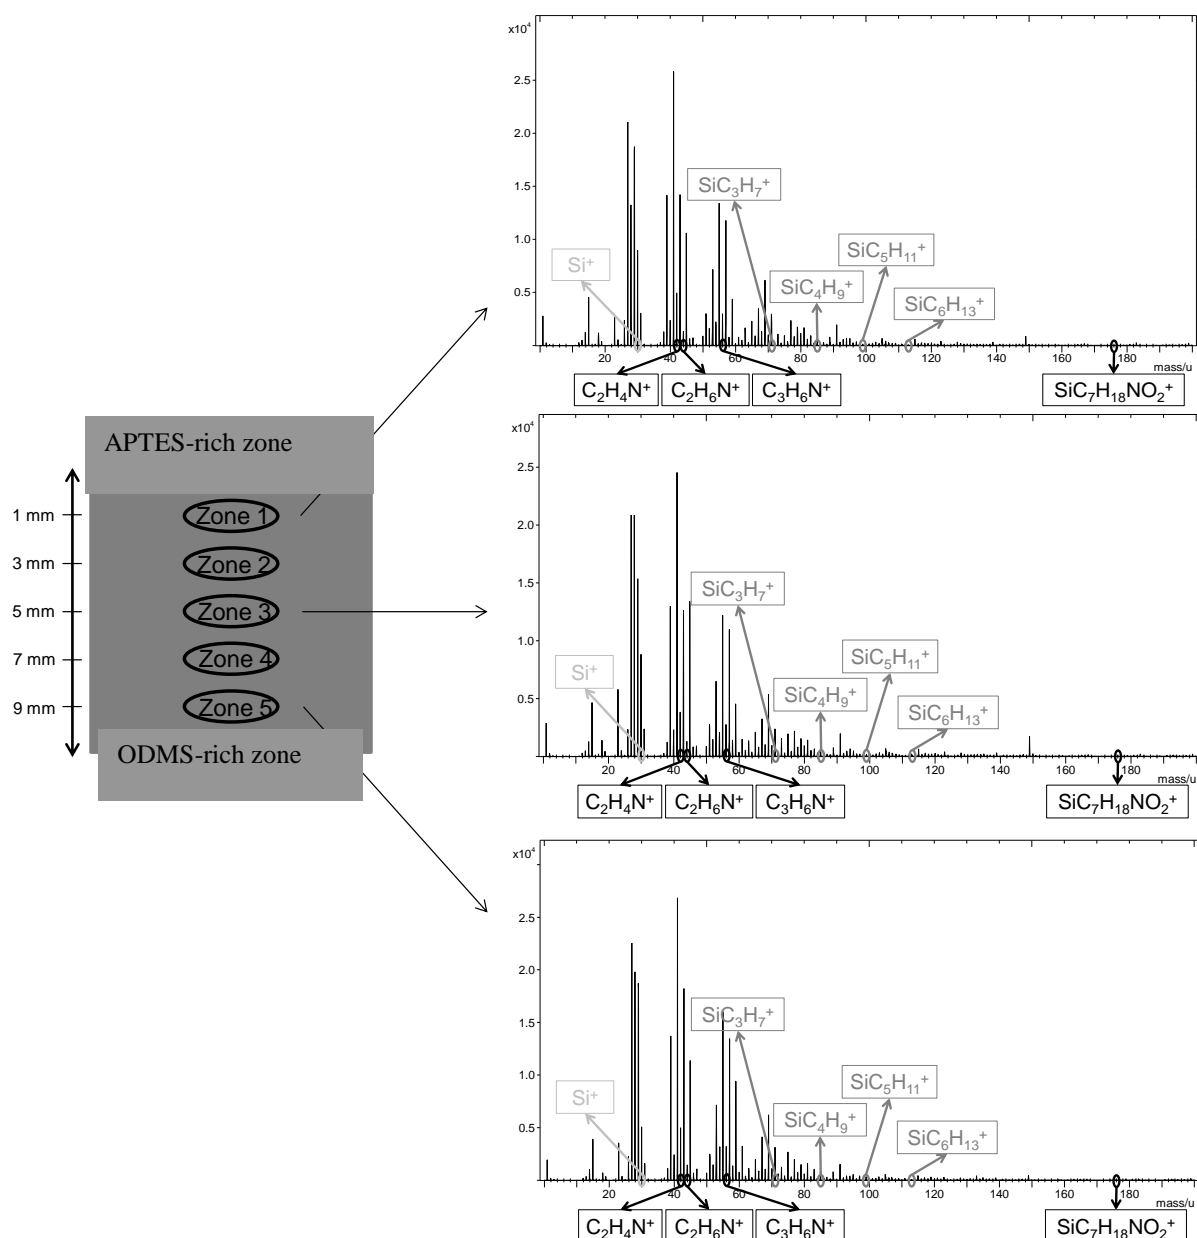

Figure 4. ToF-SIMS positive ion mass spectra of three different locations of a silica surface gradually grafted with ODMS (10 min, 110 °C) and subsequently backfilled with APTES (15 min, 25 °C, ethanol solution).
